## Differential Effects of Halothane, Enflurane, and Isoflurane on $\text{Ca}^{2+}$ Transients and Papillary Muscle Tension in Guinea Pigs

Zeljko J. Bosnjak, Ph.D.,\* Anil Aggarwal, M.D.,† Lawrence A. Turner, M.D.,‡  
John M. Kampine, M.D.,§ John P. Kampine, M.D., Ph.D.§

These studies were designed to examine the effects of inhalational anesthetics on rapid changes in myocardial intracellular  $\text{Ca}^{2+}$  and  $\text{Ca}^{2+}$  sensitivity of the contractile apparatus. The effects of halothane, enflurane, and isoflurane on rapid changes in intracellular  $\text{Ca}^{2+}$  ( $\text{Ca}^{2+}$  transients as measured with bioluminescent protein aequorin) and contractile characteristics were compared in guinea pig right ventricular papillary muscles. In addition to examination of their potencies at equianesthetic concentrations, the effects of these agents on alterations in  $\text{Ca}^{2+}$  sensitivity at myofilaments were also investigated. The negative inotropic effects of halothane (0.65 and 1.15%) and enflurane (1.0 and 2.2%) were dose-dependent and closely related to a decrease in  $\text{Ca}^{2+}$  transients. In the presence of isoflurane (0.77 and 1.6%), the contractile force decreased in a dose-dependent manner, but the decrease was significantly less as compared to that with equianesthetic concentrations of halothane and enflurane. An additional feature observed in the presence of isoflurane was a dissociation between intracellular  $\text{Ca}^{2+}$  availability and contractile force. Although the magnitude of the  $\text{Ca}^{2+}$  transients did not change when the percentage of isoflurane was increased from 0.77 to 1.6, the contractile force decreased. Because of these findings, the effects of halothane (1.2%), enflurane (2.2%), and isoflurane (1.6%) on the relationship between intracellular  $\text{Ca}^{2+}$  and tension developed in the papillary muscle were examined in order to assess myofibrillar responsiveness to  $\text{Ca}^{2+}$ . The results indicate that only isoflurane slightly but significantly shifted the  $\text{Ca}^{2+}$ /isometric tension curve toward higher intracellular  $\text{Ca}^{2+}$  concentrations; no differences were observed in the absence and presence of equianesthetic concentrations of halothane and enflurane. In summary, the weaker negative inotropic effects of isoflurane as compared to halothane and enflurane are associated with less depression of intracellular  $\text{Ca}^{2+}$  concentrations. Because it was shown previously that these agents produce equivalent depression of transsarcolemmal  $\text{Ca}^{2+}$  current at equianesthetic concentrations, it appears that halothane and enflurane are more potent in depressing cellular accumulation and release of intracellular  $\text{Ca}^{2+}$ . Overall, it appears that depression of  $\text{Ca}^{2+}$  sensitivity probably does not play a major role in the negative inotropic effects of halothane and enflurane. However, a decrease in  $\text{Ca}^{2+}$  sensitivity by isoflurane appears to be compensated for by smaller depression of  $\text{Ca}^{2+}$  transient. (Key words: Anesthetics, vol-

atile: halothane; enflurane; isoflurane. Animal: guinea pig. Heart: calcium transients; contractility. Ions: calcium; calcium sensitivity.)

STUDIES IN THE ISOLATED heart and papillary muscle demonstrate that halothane, enflurane, and isoflurane depress myocardial contractility in a dose-dependent manner with equianesthetic doses of halothane and enflurane depressing cardiac function more than isoflurane.<sup>1-6</sup> The mechanism(s) responsible for these differences are controversial. Some investigators have hypothesized that the major effect of isoflurane is *via* inhibition of  $\text{Ca}^{2+}$  influx, whereas others have attributed the difference to a greater effect on the sarcoplasmic reticulum (SR).<sup>3</sup> Determining which cellular sites are targets for the action of volatile anesthetics is difficult in the intact cardiac preparations because changes in contractile force reflect interaction between  $\text{Ca}^{2+}$  influx through the sarcolemma; release and sequestration of  $\text{Ca}^{2+}$  by the SR; activity of membrane  $\text{Ca}^{2+}$  pumps and ionic exchanges; and the  $\text{Ca}^{2+}$  sensitivity of the contractile proteins. Likewise, predictions of  $\text{Ca}^{2+}$  influx drawn from cardiac action potential configuration are complicated by interaction between different ionic fluxes across the sarcolemma.<sup>1,6,7</sup> Despite these drawbacks, increasing evidence suggests important quantitative differences between the depressant action of volatile agents on myocardial function, with equianesthetic doses of halothane and enflurane depressing cardiac function more than isoflurane. Although the direct cardiac depression observed *in vitro* is altered by indirect neural compensatory mechanisms *in vivo*,<sup>8</sup> isoflurane also appears to be a less potent cardiac depressant than either halothane or enflurane in isolated human atrial<sup>9</sup> and ventricular tissue.<sup>10</sup>

It is likely that the negative inotropic<sup>4,8</sup> and chronotropic<sup>11</sup> actions of halothane, enflurane, and isoflurane on the myocardium are related, at least in part, to their inhibition of inward  $\text{Ca}^{2+}$  current ( $I_{\text{Ca}}$ ) at the sarcolemma.<sup>12</sup> However, because all three agents depressed the  $I_{\text{Ca}}$  amplitude similarly at equianesthetic concentrations,<sup>12</sup> their quantitatively different effects on cardiac performance<sup>1-3,6,7</sup> could be due to differential actions at other cellular sites. In order to examine these effects more closely, this study was designed to examine the effects of equianesthetic concentrations of halothane, enflurane, and isoflurane on rapid changes in intracellular  $\text{Ca}^{2+}$  ( $\text{Ca}^{2+}$  transient) in papillary muscles from the guinea pig and

\* Professor, Departments of Anesthesiology and Physiology.

† Assistant Professor, Department of Anesthesiology.

‡ Research Associate, Department of Anesthesiology.

§ Professor and Chairman, Department of Anesthesiology, Professor, Department of Physiology.

Received from the Department of Anesthesiology, The Medical College of Wisconsin, Milwaukee, Wisconsin. Accepted for publication September 11, 1991. Supported in part by National Institutes of Health grants HL 34708 and HL 01901 (ZJB) and Anesthesiology Research Training Grant GM 08377.

Address reprint requests to Dr. Bosnjak: Department of Anesthesiology, Medical College of Wisconsin, MFRC, A-1000, Milwaukee, Wisconsin 53226.

the effects of these agents on isometric contractile force. In addition,  $\text{Ca}^{2+}$  sensitivity curves were obtained in the presence of inhalational anesthetics for comparison of  $\text{Ca}^{2+}$  sensitivity in the intact cardiac muscle.

### Materials and Methods

These experiments were approved by the Medical College of Wisconsin Animal Care Committee.

After intraperitoneal ketamine injection, guinea pigs were decapitated, and the hearts were quickly removed and perfused briefly with cold oxygenated Krebs' solution. Right ventricular papillary muscles having a width of less than 1 mm (mean OD = 0.7 mm) were excised from 31 guinea pigs and mounted horizontally in a single low-volume, high-flow chamber (1-ml volume, 5-ml/min flow). Oxygenated Krebs' solution was composed of the following (millimolar): NaCl 137, KCl 4.5,  $\text{CaCl}_2$  2.5,  $\text{MgCl}_2$  1.2,  $\text{NaH}_2\text{PO}_4$  1.2,  $\text{NaHCO}_3$  15.5, and dextrose 11.5 (pH  $7.40 \pm 0.05$ ); this solution was equilibrated with a 97%  $\text{O}_2$ -3%  $\text{CO}_2$  mixture and circulated at  $30^\circ\text{C}$  as reported earlier.<sup>13</sup>

The papillary muscles were field-stimulated at 0.5 or 1 Hz throughout the experiment with 2-ms pulses at slightly above the threshold strength. The chorda tendineae of the muscle was connected with a fine 10-0 thread to the arm of the miniature isometric force transducer (BG 10, Kulite Semiconductor Products, Inc., Ridgefield, NJ). At the beginning of each experiment, the muscle length was adjusted to a point where the tension developed was maximal. The experiments were conducted at  $30^\circ\text{C}$  because it was observed that muscles maintained a stable level of developed tension and light signal for a longer period of time as compared to that obtained at  $37^\circ\text{C}$ .

Highly purified aequorin used in this study was obtained from the laboratory of Dr. J. R. Blinks (Rochester, MN). Lyophilized aequorin was reconstituted to a concentration of 2 mg/ml with  $\text{Ca}^{2+}$ -free distilled water to give an aqueous solution containing 150 mM KCl and 5 mM HEPES buffer at pH 7.5. The aequorin solution was filtered and placed into fine microelectrodes. Platinum wire was positioned inside the micropipettes to permit simultaneous recording of cellular potentials while applying nitrogen pressure of up to 100 psi to the pipette. It was necessary to inject at least 50 cells in order to obtain satisfactory light signals. The intracellular aequorin light signals provide a good indication of the overall magnitude and time course of the intracellular myoplasmic  $\text{Ca}^{2+}$  concentrations.<sup>14,15</sup> The light emitted by aequorin was recorded in a light proof setting using a photomultiplier cathode. Successive contractile forces and light signals were averaged (100 consecutive beats; model 9153 Hewlett-Packard computer) to obtain satisfactory luminescence signal-to-noise ratios. Light signals were expressed in

terms of anode current in nanoamperes, while tension was normalized for the cross sectional area of the muscle and expressed as millinewtons per square millimeter. Resting light emission was low and so close to the threshold for detection that it was not feasible to investigate the effects of different anesthetics on the resting photon emission. Anesthetics were tested for their direct effects on the aequorin light emission by injecting aequorin ( $10^{-8}\text{M}$ ) into a  $\text{Ca}^{2+}$  buffer solution containing 150 mM KCl, 5 mM HEPES, and  $3\text{ }\mu\text{M}$   $\text{Ca}^{2+}$  (pH 7.0). Aequorin light emission was monitored at  $30^\circ\text{C}$ .

Individual anesthetics were introduced to the superfusate reservoir for at least 20 minutes *via* calibrated vaporizers. Anesthetic concentrations in the tissue bath were measured during anesthetic exposure using a gas chromatograph with a flame ionization detector. The bath concentrations at  $30^\circ\text{C}$  were converted to their equivalent percentages in the gas phase. The mean concentrations (volume percent) were as follows: halothane 0.65 and 1.15, enflurane 1.0 and 2.2, and isoflurane 0.77 and 1.6. These levels of anesthetics are referred to as low and high concentrations. The potency ratios for these agents were reasonably close to the estimated potency ratios for the guinea pig—1:2.15:1.14 for halothane, enflurane, and isoflurane, respectively.<sup>16</sup> Papillary muscles were exposed to the desired concentration of anesthetic in random order for 10 min prior to measurements of contractile force and light signal. After the measurements, there was a 10-min period for anesthetic washout and control measurements. Each papillary muscle was exposed to lower and higher concentrations of all three anesthetics in random order.

To directly examine the effects of halothane, enflurane, and isoflurane on the relationship between intracellular  $\text{Ca}^{2+}$  and tension development, simultaneous measurements of  $\text{Ca}^{2+}$  transients and isometric contractile force were performed by increasing the extracellular  $\text{Ca}^{2+}$  in steps from 1 to 12–17 mM. Myofibrillar responsiveness to  $\text{Ca}^{2+}$  studies were conducted as a single series of control measurements under different extracellular concentrations of  $\text{Ca}^{2+}$ , followed by a similar series in the presence of higher concentration of each anesthetic. Contractile force measurements and  $\text{Ca}^{2+}$  transient changes were taken 10 min after extracellular  $\text{Ca}^{2+}$  change.  $\text{Ca}^{2+}$  sensitivity curves were obtained by plotting the peak isometric contractile force and peak light intensity. The light intensity was expressed in terms of the 2.5th root of the anodal current, because the light emission from the aequorin varies approximately in proportion to the 2.5th power of the  $\text{Ca}^{2+}$  concentration.

Because there was a small reduction in light signal over time, data for each test condition were bracketed (average of values before and after exposure to anesthetic) for data tabulation and statistical analyses. Differences in contrac-

tile force and  $\text{Ca}^{2+}$  transient parameters between anesthetics and the respective doses were evaluated using two-way analysis of variance, and the means were compared by the least significant difference test. Comparison of the relationship between peak isometric contractile force and peak aequorin light measured at various extracellular  $\text{Ca}^{2+}$  concentrations before and after inhalational anesthetics were compared by expressing the above measurements as percentages of maximum response obtained during the control. Their respective regression lines were compared for differences in slopes using a Test for Parallelism.

### Results

The direct effects of halothane, enflurane, and isoflurane on aequorin luminescence were tested *in vitro* by injecting aliquots of aequorin ( $10^{-8}$  M) into a buffer solution containing several concentrations of the anesthetic agents (halothane 0.8 and 1.6%, isoflurane 1.1 and 2%, and enflurane 1.3 and 2.5%). At these concentrations the anesthetics had no significant direct effect on the intensity of luminescence, indicating that these agents do not interact with aequorin.

The effects of inhalational anesthetic agents at higher concentrations on the  $\text{Ca}^{2+}$  transients and the contractile force of a typical guinea pig papillary muscle preparation are shown in figure 1. Anesthetic depression of contractile force was accompanied by depression of the intracellular  $\text{Ca}^{2+}$  signal, and, as illustrated, the depression of the  $\text{Ca}^{2+}$  transients in the presence of the isoflurane was less than that produced in the presence of halothane or enflurane ( $P < 0.05$ ). The rapid increase in intracellular  $\text{Ca}^{2+}$  concentration following the initiation of the action potential, as seen in figure 1, is believed to be due primarily to  $\text{Ca}^{2+}$  release from the SR, and this rapid release is generally believed to involve a  $\text{Ca}^{2+}$ -induced  $\text{Ca}^{2+}$  release mechanism.<sup>17,18</sup>

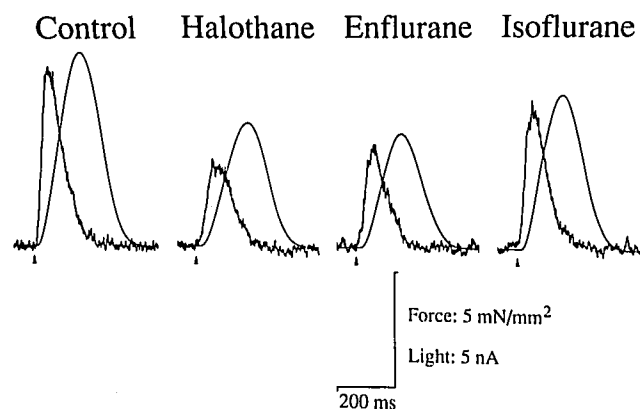

FIG. 1. Effects of higher concentrations of halothane (1.1%), enflurane (2.2%), and isoflurane (1.6%) on aequorin signal and isometric contractions of a single isolated guinea pig papillary muscle. Pacing rate 1 Hz (at the arrowhead), 30° C.

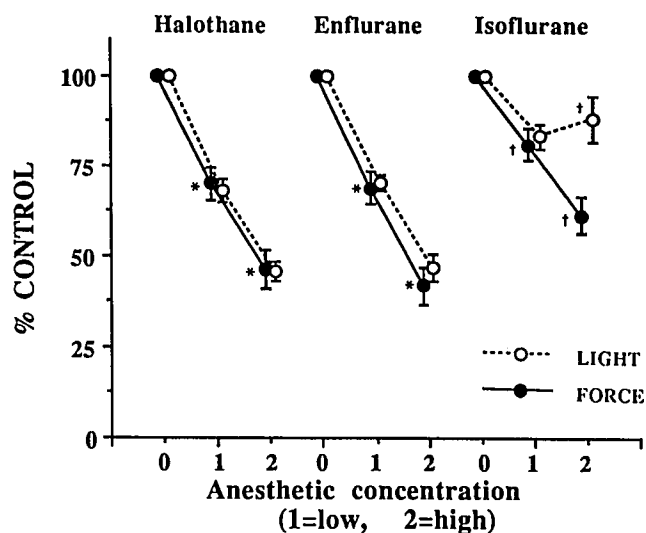

FIG. 2. Effects of halothane, enflurane, and isoflurane at lower and higher concentrations on the peak tension development and peak aequorin signal as percentage of control in the isolated guinea pig papillary muscle. \* $P < 0.05$  versus 0 (no anesthetic control); † $P < 0.05$  versus other anesthetics at the same concentration.  $n = 13$ .

Therefore, the  $\text{Ca}^{2+}$  that enters the cytoplasm via  $\text{Ca}^{2+}$  channels contributes to the  $\text{Ca}^{2+}$  transient by acting both as a trigger for release of  $\text{Ca}^{2+}$  and as the primary source of  $\text{Ca}^{2+}$  for the SR.

The comparative effects of halothane, enflurane, and isoflurane on the amplitude of the  $\text{Ca}^{2+}$  transients and peak isometric force are summarized in figure 2. The values are means  $\pm$  SEM as percentages of control. The negative inotropic effects of halothane and enflurane were dose-dependent and closely related to the decrease in intracellular  $\text{Ca}^{2+}$ . Isoflurane also reduced contractile force in a dose-dependent manner, but the decrease was significantly less as compared to that produced by halothane and enflurane. A difference observed with isoflurane was a dissociation between intracellular  $\text{Ca}^{2+}$  availability and contractile force. Although the magnitude of the  $\text{Ca}^{2+}$  transient did not change when the concentration of isoflurane was increased from low to high concentration, the contractile force decreased.

Figure 3 represents the effect of halothane, enflurane, and isoflurane on time to peak amplitude of the aequorin signal and of the isometric contractile force (measured from stimulus artifact to the signal peak). Halothane was the only anesthetic to increase both the time to peak  $\text{Ca}^{2+}$  transient and time to peak tension. These effects could be due to a smaller  $\text{Ca}^{2+}$  release from the SR secondary to a lesser  $\text{Ca}^{2+}$  gradient between the SR and the cytoplasm following the attenuated  $\text{Ca}^{2+}$  uptake by the SR, although the underlying relationship between these two observations is not known, along with the role of troponin-C  $\text{Ca}^{2+}$  binding. On the other hand, the falling phase of

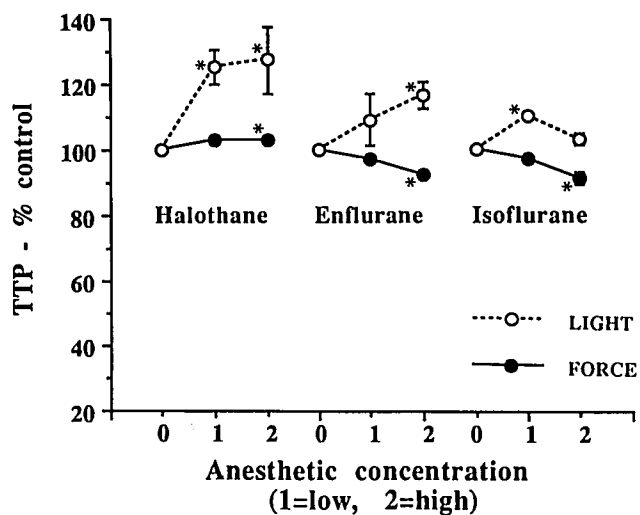

FIG. 3. Effects of two doses of halothane, enflurane, and isoflurane on time duration between the stimulus and the peak amplitude (time to peak [TTP]) of the aequorin signal and isometric contractile force as percentage of control in the isolated guinea pig papillary muscle. Anesthetic concentration: 0, low (1), high (2). \* $P < 0.05$  versus 0.  $n = 13$ .

the  $\text{Ca}^{2+}$  transient and contractile force contribute to a change in the duration of the force and light that are measured at half of peak amplitude (fig. 4). Generally, a slower falling phase of the aequorin signal may suggest that there is a slower removal of  $\text{Ca}^{2+}$  from the myoplasm by the SR, a slower  $\text{Na}^+/\text{Ca}^{2+}$  exchange or altered affinity of troponin-C for  $\text{Ca}^{2+}$ .

The time course of the aequorin signal and the isometric contractile force from a single guinea pig papillary muscle are shown in figure 5. The aequorin signal and contractile force from control are displayed in their true proportions, while the tracings in the presence of all three anesthetics are adjusted electronically to equal control amplitude, to examine the duration and shape of the light signal and the force. As shown, only halothane substantially lengthens the slower falling phase of the aequorin signal. Because electronic adjustments may disproportionately alter certain phases of the signal, similar comparisons were performed after the aequorin signal was increased in the presence of inhalational agents by increasing the extracellular concentration of  $\text{Ca}^{2+}$ . Under these conditions, halothane was again the most effective in prolonging the duration of aequorin signal (data not shown). These results indicate that halothane was more potent in increasing the duration of the  $\text{Ca}^{2+}$  transient as measured at half of the peak amplitude, and that isoflurane slightly shortened the  $\text{Ca}^{2+}$  transients (fig. 4). This abbreviation of the light signal suggests a faster removal of  $\text{Ca}^{2+}$  from cytoplasm by the SR in the presence of isoflurane as compared to halothane and enflurane.

The changes in sensitivity of troponin-C to  $\text{Ca}^{2+}$  and/or altered response of the myofilaments to a given level of occupancy of the  $\text{Ca}^{2+}$  binding sites on troponin-C ("downstream mechanisms") were examined in 18 papillary muscles. This was accomplished by increasing the extracellular concentration of  $\text{Ca}^{2+}$  to 12 mM during the control and to 17 mM in the presence of higher concentration of inhalational agents. Figure 6 illustrates the changes in intracellular  $\text{Ca}^{2+}$  and contractile force developed in a single guinea pig papillary muscle at various concentrations of extracellular  $\text{Ca}^{2+}$  during control and in the presence of isoflurane. Comparisons of the relationship between peak isometric force and peak aequorin light signal measured in the same muscle were made at various extracellular  $\text{Ca}^{2+}$  concentrations before and after the individual inhalational agents.

Figure 7A shows the findings in a single papillary muscle for the control and in the presence of 0.6 mM halothane. The contractile force and  $\text{Ca}^{2+}$  transients were normalized to a percentage of the maximum control response for each experiment and plotted as illustrated in figure 7B along with regression lines. Figure 7C and 7D illustrate the same analysis in the presence of enflurane. No differences were found between regression slopes of  $\text{Ca}^{2+}$  sensitivity obtained in the absence and the presence of equianesthetic concentrations of halothane and enflurane. Only in the presence of isoflurane did we find a slight shift in the  $\text{Ca}^{2+}$  isometric curve toward the higher intracellular concentrations (fig. 8A), along with a significant ( $P < 0.005$ ) decrease in the regression slope of the  $\text{Ca}^{2+}$  sensitivity (fig. 8B). Thus, in the presence of isoflurane, a greater  $\text{Ca}^{2+}$  transient was required to produce similar isometric force seen under control conditions.

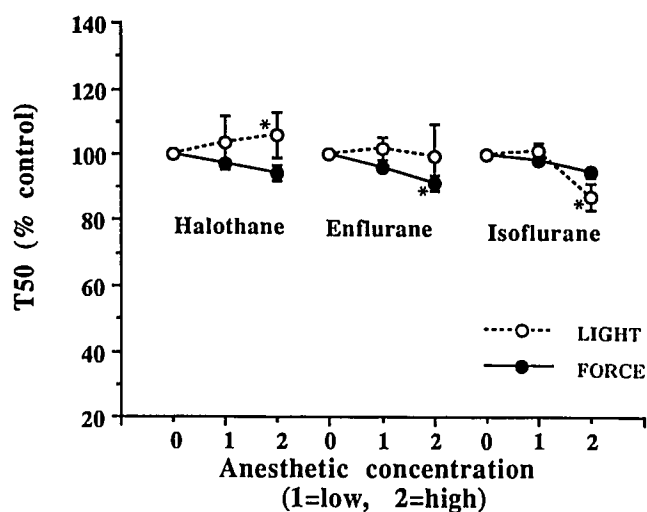

FIG. 4. Effects of two doses of halothane, enflurane, and isoflurane on the duration of aequorin light and contractile force measured at half of peak amplitude (T<sub>50</sub>) in the guinea pig papillary muscle. Anesthetic concentration: 0, low (1), high (2). \* $P < 0.05$  versus 0.  $n = 13$ .

FIG. 5. Effects of higher concentrations of halothane (H), enflurane (E), and isoflurane (I) (1.0, 2.1, and 1.6%, respectively) on time courses of the aequorin signals and isometric contractions from the same guinea pig papillary muscle. Aequorin signals and contractions during the control (C) are displayed in their true proportions. The vertical gain of the signals obtained during anesthetics (H, E, or I) have been adjusted electronically to make the amplitudes of the signals match those recorded during the control.

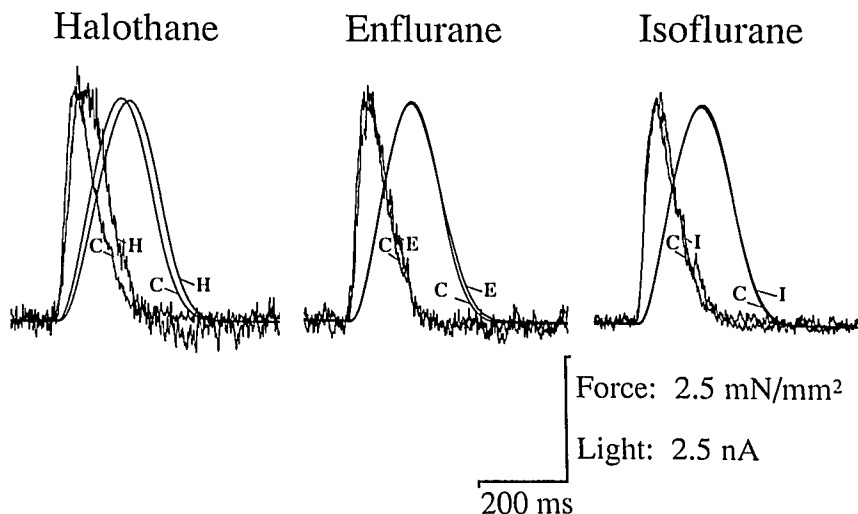

### Discussion

Volatile anesthetics at clinically useful concentrations depress the contractile force of the heart, and these actions in part contribute to significant decrement of cardiovascular homeostasis. Studies in isolated heart and papillary muscle preparations consistently demonstrate that these agents produce dose-dependent decreases of indices of contractility, with equianesthetic doses of halothane and enflurane depressing cardiac function more than isoflurane. The mechanisms underlying the negative inotropic effects of the volatile anesthetics are not fully understood. Contractile force generated in the beating heart is associated with the increase and decrease of intracellular  $\text{Ca}^{2+}$  ion concentration. There are several mechanisms by which agents may directly alter contractile performance of cardiac muscle. The first group represents "upstream" mechanisms whereby  $\text{Ca}^{2+}$  transients are influenced mainly by a variety of effectors at the surface membrane and SR. The second group, "downstream" mechanisms, involves changes in sensitivity of troponin-C to  $\text{Ca}^{2+}$  or an altered response of the myofilaments to a given level of occupancy of the  $\text{Ca}^{2+}$  binding sites on troponin-C. The sites of action of volatile anesthetics are difficult to separate because a change in the influx of sarcolemmal  $\text{Ca}^{2+}$  alters the sequestration of  $\text{Ca}^{2+}$  in the SR and ultimately the level of myoplasmic  $\text{Ca}^{2+}$  available as the  $\text{Ca}^{2+}$  transient to activate the contractile proteins. Despite these difficulties, accumulating evidence suggests that the volatile anesthetics act in a number of specific ways, including: 1) effects on the sarcolemmal flux of  $\text{Ca}^{2+}$ ; 2) alteration in SR function; 3) decreasing the level of intracellular ionized  $\text{Ca}^{2+}$  during systole; and 4) modification of the responsiveness of the contractile proteins to activation by  $\text{Ca}^{2+}$ .

Although several types of voltage-dependent  $\text{Ca}^{2+}$  channels exist in various cell types,<sup>19</sup> the  $\text{Ca}^{2+}$  channels

of cardiac muscle include the low-threshold transient (T-type) channels and the high-threshold long-lasting (L-type channels). Although it has been shown that  $\text{Ca}^{2+}$  influx *via* L-type  $\text{Ca}^{2+}$  channels is required for SR  $\text{Ca}^{2+}$  release in heart muscle,<sup>20</sup> the role of  $\text{Ca}^{2+}$  influx *via*  $\text{Ca}^{2+}$  channels as a prerequisite for SR  $\text{Ca}^{2+}$  release has been challenged. One recent study has suggested that the triggered  $\text{Ca}^{2+}$  may also enter *via*  $\text{Na}^+/\text{Ca}^{2+}$  exchange.<sup>21</sup> In ventricular cells, the L-type channel is predominant, and current through T-type channels is small, decays quickly, and contributes little to the total  $\text{I}_{\text{Ca}}$  during the cardiac action potential.<sup>22</sup> Halothane has been shown to reduce a slow inward current in the isolated rat ventricular cells.<sup>23</sup>

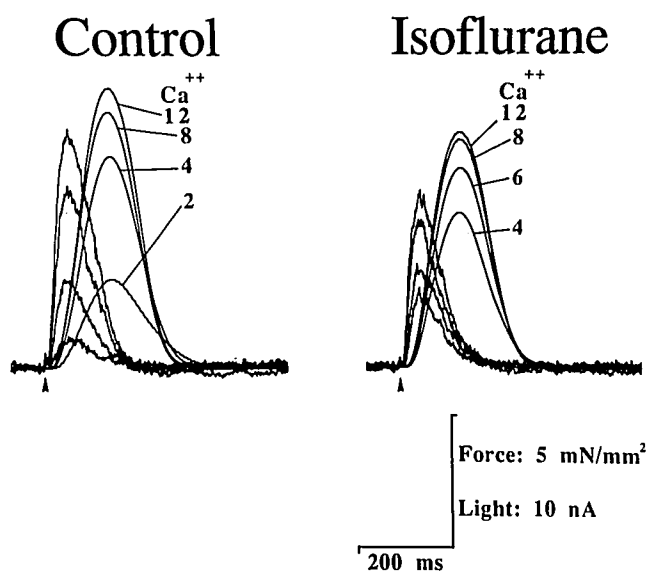

FIG. 6. Effects of various concentrations of extracellular calcium (indicated in millimolar concentrations) on aequorin signal and isometric contraction of a single isolated guinea pig papillary muscle during control and after exposure to 1.6% isoflurane.

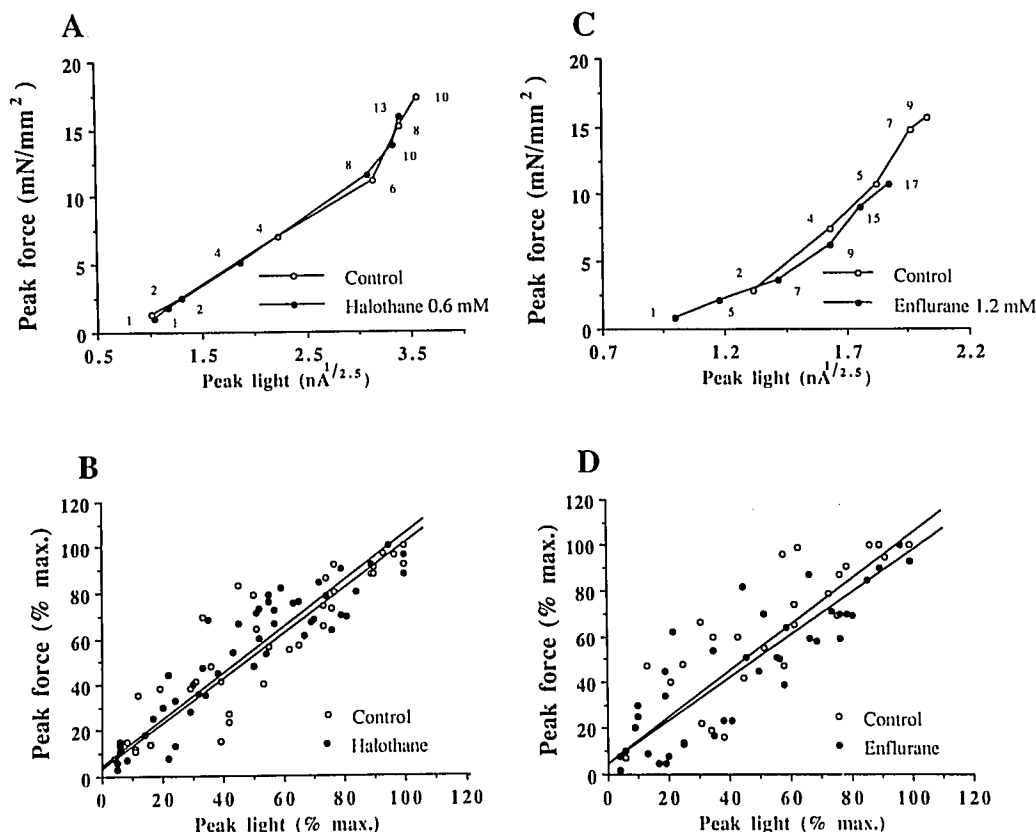

FIG. 7. A: Comparison of the relationship between peak isometric contractile force and peak aequorin light measured in the same muscle at various extracellular calcium concentrations before and after halothane (0.6 mM or 1.2%). The 2.5th root of the amplitude of the aequorin signals was used as an indicator of the amplitude of the  $\text{Ca}^{2+}$  transient. The numbers beside the points indicate extracellular  $\text{Ca}^{2+}$  in millimolar concentrations. Higher concentrations of extracellular  $\text{Ca}^{2+}$  produced either no further increase or a decrease in the force developed, and those values are not shown in the graph. C: Similar comparison in the presence of 1.2 mM enflurane (2.2%). B, D: Summary of the relationships between the peak contractile force and the peak light expressed as a percentage of maximal response along with regression lines obtained during the control and in the presence of anesthetics. Regression lines were not statistically significant for either anesthetic ( $n = 6$  for each agent).

Our previous study<sup>12</sup> showed that halothane, enflurane, and isoflurane, when tested in the same cardiac myocytes under identical conditions, produce equivalent depression of peak  $\text{I}_{\text{Ca}}$  at equianesthetic concentration without shifting the current-voltage relationship for channel activation. Presuming that effects in enzymatically isolated myocytes reflect intact myocardium, it would be unlikely that the differences between anesthetic action on contractile force generation are due to these actions on sarcolemmal  $\text{Ca}^{2+}$  channels because halothane, enflurane, and isoflurane produce similar depression of  $\text{I}_{\text{Ca}}$ . Other differences between anesthetic effects at the sarcolemmal level, such as the effect on the  $\text{Na}^{+}/\text{Ca}^{2+}$  exchange and the membrane  $\text{Ca}^{2+}$  pump, also cannot be completely excluded.

Measurements of changes in free-intracellular  $\text{Ca}^{2+}$  using the bioluminescent protein aequorin and contractile force, as performed in this study, indicate that the weaker negative inotropic effect of isoflurane as compared to

halothane and enflurane is associated with less depression of the peak intracellular  $\text{Ca}^{2+}$  concentration. The decrease in  $\text{Ca}^{2+}$  transients by these agents is likely related to the inhibition of  $\text{I}_{\text{Ca}}$  at the sarcolemma,<sup>12</sup> which in turn could affect the quantity of  $\text{Ca}^{2+}$  released by the SR. Because there was no quantitative difference between the effects of isoflurane and the other two agents on  $\text{I}_{\text{Ca}}$  amplitude in the previous study,<sup>12</sup> the sarcolemmal  $\text{Ca}^{2+}$  flux is an unlikely site for their differential cellular effects.

While halothane, enflurane, and isoflurane decrease the  $\text{I}_{\text{Ca}}$ , it is expected that over many beats, these fluxes will contribute to the decrease in SR loading and that therefore the SR will release less  $\text{Ca}^{2+}$ . In addition, it was suggested that these agents also depress the net SR  $\text{Ca}^{2+}$  uptake and contribute to the negative inotropic effect.<sup>24,25</sup> In addition to the effects of  $\text{Ca}^{2+}$  uptake, the possibility exists that inhalational anesthetics might also increase the rate of  $\text{Ca}^{2+}$  leak from the SR during rest and therefore contribute to depletion of SR  $\text{Ca}^{2+}$  content. In any event,

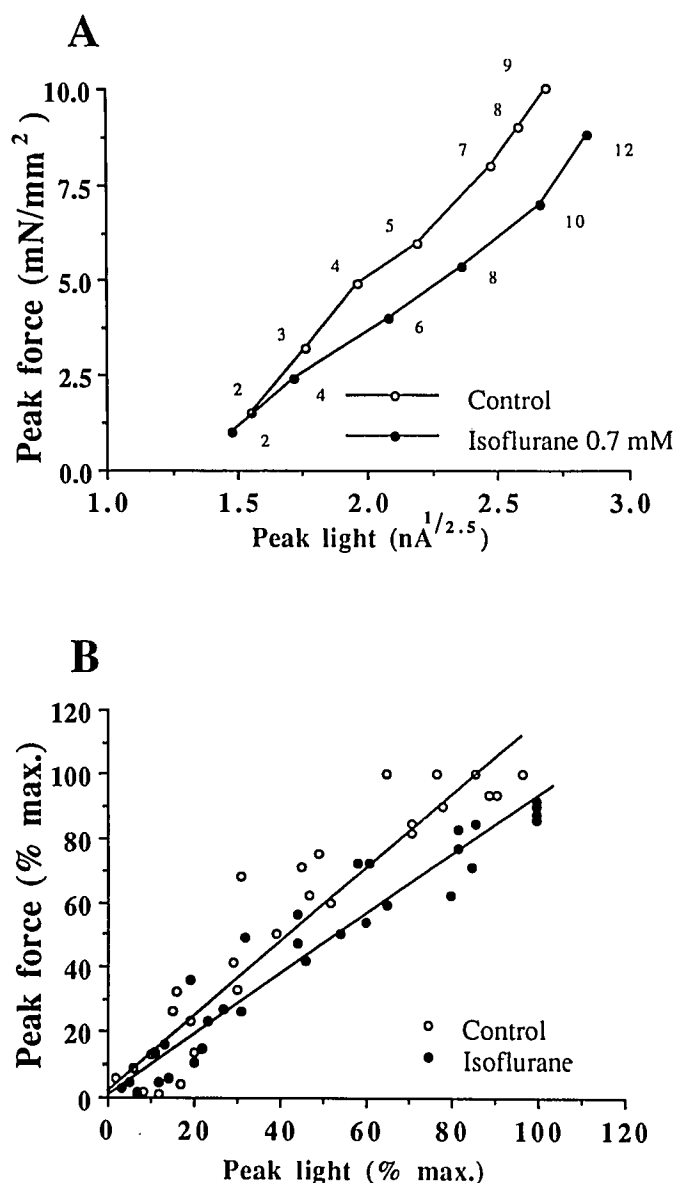

FIG. 8. A: Comparison of the relationship between peak isometric contractile force and peak aequorin light measured in the same muscle at various extracellular calcium concentrations before and after isoflurane (0.7 mM or 1.6%). The numbers beside the points indicate extracellular  $\text{Ca}^{2+}$  in millimolar concentrations. B: A significant shift of the regression line was obtained in the presence of isoflurane when tested for parallelism ( $n = 6$ ).

because  $\text{Ca}^{2+}$  transients are dominated by  $\text{Ca}^{2+}$  that is released from SR,<sup>15,26</sup> the most potent negative inotropic anesthetic is expected to have the greatest effect on the SR.

The major determinant of the decline of the  $\text{Ca}^{2+}$  transient in heart muscle is likely to be reuptake of  $\text{Ca}^{2+}$  by the SR,<sup>26</sup> although this decline might be modulated by changes in myofibrillar  $\text{Ca}^{2+}$  sensitivity. The SR  $\text{Ca}^{2+}$ -pumping ATP-ase appears to be responsible for the ma-

jority of the rate of decline of the  $\text{Ca}^{2+}$  transients once release of  $\text{Ca}^{2+}$  is over.<sup>27,28</sup> The greater role of the SR for  $\text{Ca}^{2+}$  reuptake is due to a greater  $\text{Ca}^{2+}$  ATP-ase affinity for  $\text{Ca}^{2+}$  and a higher rate of transfer relative to that of sarcolemmal  $\text{Ca}^{2+}$  ATP-ase. In addition to these pumps, the  $\text{Na}^+/\text{Ca}^{2+}$  exchange also contributes to the decline of the  $\text{Ca}^{2+}$  transient.<sup>29</sup> Therefore, if anesthetic agents decrease the rate of  $\text{Ca}^{2+}$  uptake by the SR, it is expected that they would have a corresponding effect on the rate of decline of the aequorin signal. As seen from these results, halothane was most effective in lengthening the time to peak duration of the aequorin signal as well as the time of the  $\text{Ca}^{2+}$  transient measured at half of peak amplitude. The amplitudes of aequorin signal obtained in the presence of anesthetics also were adjusted electronically for comparisons of their time courses. In addition, because the upper part of the aequorin signal due to this adjustment might be disproportionately prolonged,<sup>26</sup> the time course of aequorin signals that have been increased to the equal magnitude by increases in extracellular  $\text{Ca}^{2+}$  were also compared with control. During all measurements, in the presence of higher concentrations of halothane, the aequorin signal was longer than that recorded during control measurements, whereas isoflurane at similar concentration decreased the duration at half of peak amplitude of the aequorin signal. This finding might imply that halothane delays the rate of  $\text{Ca}^{2+}$  removal by both the SR and/or  $\text{Na}^+/\text{Ca}^{2+}$  exchange. In the presence of isoflurane,  $\text{Ca}^{2+}$  removal is well maintained as indicated by the decrease in  $T_{50}$ .

Several studies of anesthetic effects on skinned muscle preparation suggest that volatile anesthetics may depress myofibrillar  $\text{Ca}^{2+}$  sensitivity.<sup>30,31</sup> Although valuable information was obtained regarding the relationship between intracellular  $\text{Ca}^{2+}$  and contractile force in the mammalian cardiac tissue using the skinned muscle preparations, extrapolation of the findings to the intact myocytes might be difficult.<sup>32</sup> Specifically, it appears that the myofilament sensitivity to  $\text{Ca}^{2+}$  may be greater in intact muscle than in skinned preparations. It was reported that the  $\text{Ca}^{2+}$  required for maximal activation of intact muscle fiber is less than or equal to  $1 \mu\text{M}$ .<sup>29</sup> On the other hand, the concentrations of  $\text{Ca}^{2+}$  producing maximal contractions in skinned muscles are approximately  $10 \mu\text{M}$ .<sup>33</sup> In intact ferret papillary muscle, Housmans *et al.*<sup>34</sup> have measured force generation and intracellular  $\text{Ca}^{2+}$  transients in the presence and absence of volatile anesthetics. They concluded that although each agent has an inhibitory effect on myofibrillar  $\text{Ca}^{2+}$  responsiveness (with isoflurane having the largest effect), the relative magnitude of the effect is small relative to the ability of the agents to decrease  $\text{Ca}^{2+}$  availability.<sup>35</sup> In the present study, also using intact muscles, inference is made about the  $\text{Ca}^{2+}$ -tension relationship, but one should be cautious about

comparing these findings with those obtained using skinned muscle, because unlike in the skinned muscle experiments, maximal force was not achieved, and the relationship between the  $\text{Ca}^{2+}$  and tension was not obtained at steady-state. The results of the present study suggest that while halothane and enflurane do not alter myofibrillar  $\text{Ca}^{2+}$  sensitivities, isoflurane depresses  $\text{Ca}^{2+}$  sensitivity despite relatively less influence on the  $\text{Ca}^{2+}$  transient and overall contractile force development.

In summary, these results support previous findings<sup>36,37</sup> on the differential effects of halothane and isoflurane by direct measurements of intracellular  $\text{Ca}^{2+}$  transients. Using intact papillary muscle preparations, these studies could not confirm the depressant effects of halothane and enflurane on  $\text{Ca}^{2+}$  sensitivity obtained from either mechanically<sup>30</sup> or chemically<sup>31</sup> treated cardiac fibers. Our results suggest that depression of  $\text{Ca}^{2+}$  sensitivity probably does not play a role in the negative inotropic effects of halothane and enflurane. However, a decrease of  $\text{Ca}^{2+}$  sensitivity by isoflurane may play a role in the more modest depression of contractile force, although this appears to be compensated for by less depression of the  $\text{Ca}^{2+}$  transient. Furthermore, results obtained from the  $\text{Ca}^{2+}$  transients are in agreement with results obtained using different methodology<sup>38,39</sup> showing that halothane and enflurane are more potent in depressing cellular accumulation and release of intracellular  $\text{Ca}^{2+}$  than is isoflurane. These effects of inhalational agents could lead to a decrease in  $\text{Ca}^{2+}$  content of cardiac cells<sup>40,41</sup> and most likely contribute to the cardiac protection following ischemia and  $\text{Ca}^{2+}$  paradox.<sup>42</sup>

## References

1. Rusy BF, Komai H: Anesthetic depression of myocardial contractility: A review of possible mechanisms. *ANESTHESIOLOGY* 67: 745-766, 1987
2. Housmans PR, Murat I: Comparative effects of halothane, enflurane, and isoflurane at equipotent anesthetic concentrations on isolated ventricular myocardium of the ferret: I. Contractility. *ANESTHESIOLOGY* 69:451-463, 1988
3. Komai H, Rusy BF: Negative inotropic effects of isoflurane and halothane in rabbit papillary muscles. *Anesth Analg* 66:29-33, 1987
4. Bosnjak ZJ, Kampine JP: Effects of halothane on transmembrane potentials,  $\text{Ca}^{2+}$  transients, and papillary muscle tension in the cat. *Am J Physiol* 251:H374-H381, 1986
5. Lynch C III, Vogel S, Pratila MG, Sperelakis N: Enflurane depression of myocardial slow action potentials. *J Pharmacol Exp Ther* 222:405-409, 1982
6. Lynch C III: Differential depression of myocardial contractility by halothane and isoflurane *in vitro*. *ANESTHESIOLOGY* 64:620-631, 1986
7. Atlee JL, Bosnjak ZJ: Mechanisms for cardiac dysrhythmias during anesthesia. *ANESTHESIOLOGY* 72:347-374, 1990
8. Seagard JL, Bosnjak ZJ, Hopp FA, Kotrly KJ, Ebert TJ, Kampine JP: Cardiovascular effects of general anesthesia, Effects of Anesthesia. Edited by Covino BG, Fozzard HA, Rehder K, Strichartz G. Baltimore, William & Wilkins, 1985 pp 149-177
9. Luk H-N, Lin C-I, Wei J, Chang C-L: Depressant effects of isoflurane and halothane on isolated human atrial fibers. *ANESTHESIOLOGY* 69:667-676, 1988
10. Lynch C III: Effects of halothane and isoflurane on isolated human ventricular myocardium. *ANESTHESIOLOGY* 68:429-432, 1988
11. Bosnjak ZJ, Kampine JP: Effects of halothane, enflurane and isoflurane on the SA node. *ANESTHESIOLOGY* 58:314-321, 1983
12. Bosnjak ZJ, Supan FD, Rusch NJ: The effects of halothane, enflurane and isoflurane on calcium current in isolated canine ventricular cells. *ANESTHESIOLOGY* 74:340-345, 1991
13. Bosnjak ZJ, Aggarwal A, Turner LA, Marijic J, Kampine JP: Differential effects of inhalational anesthetics on calcium sensitivity (abstract). *Biophys J* 57:338A, 1990
14. Allen DG, Orchard CH: The effects of changes of pH on intracellular calcium transients in mammalian cardiac muscle. *J Physiol (Lond)* 335:555-567, 1983
15. Blinks JR, Wier WG, Hess P, Prendergast FG: Measurements of  $\text{Ca}^{2+}$  concentration in living cells. *Prog Biophys Mod Biol* 40: 1-114, 1982
16. Seifen AB, Kennedy RH, Bray JP, Seifen E: Estimation of minimum alveolar concentration (MAC) for halothane, enflurane and isoflurane in spontaneously breathing guinea pigs. *Lab Anim Sci* 39:579-581, 1989
17. Fabiato A: Calcium-induced release of calcium from the cardiac sarcoplasmic reticulum. *Am J Physiol* 245:C1-C14, 1983
18. Morad M, Goldman Y: Excitation-contraction coupling in heart muscle: Membrane control of development of tension. *Prog Biophys Mol Biol* 27:257-313, 1973
19. McCleskey EW, Fox AP, Feldman D, Tsien RW: Different types of calcium channels. *J Exp Biol* 124:177-190, 1986
20. Nabauer M, Callewaert G, Cleemann L, Morad M: Regulation of calcium release is gated by calcium current not gating charge, in cardiac myocytes. *Science* 244:800-803, 1989
21. Leblanc N, Hume JR: Sodium current-induced release of calcium from cardiac sarcoplasmic reticulum. *Science* 248:372-376, 1990
22. Nilius B, Hess P, Lansman JB, Tsien RW: A novel type of cardiac channel in ventricular cells. *Nature* 316:443-446, 1985
23. Ikemoto Y, Yatani A, Arimura H, Yoshitake J: Reduction of the slow inward current of isolated rat ventricular cells by thiamylal and halothane. *Acta Anaesthesiol Scand* 29:583-586, 1985
24. Su JY, Kerrick WGL: Effects of halothane on caffeine-induced tension transients in functionally skinned myocardial fibers. *Pflügers Arch* 380:29-34, 1979
25. Su JY, Kerrick WGL: Effects of enflurane on functionally skinned myocardial fibers from rabbits. *ANESTHESIOLOGY* 52:385-389, 1980
26. Endoh GM, Blinks JR: Actions of sympathomimetic amines on the  $\text{Ca}^{2+}$  transients and contractions of rabbit myocardium: Reciprocal changes in myofibrillar responsiveness to  $\text{Ca}^{2+}$  mediated through  $\alpha$ - and  $\beta$ -adrenoceptors. *Circ Res* 62:247-265, 1988
27. Carafoli E: Membrane transport of calcium: An overview. *Methods Enzymol* 157:3-11, 1988
28. Inesi G: Mechanism of calcium transport. *Annu Rev Physiol* 47: 573-601, 1985
29. Wier WG: Cytoplasmic  $[\text{Ca}^{2+}]$  in mammalian ventricle: Dynamic control by cellular processes. *Annu Rev Physiol* 52:467-485, 1990
30. Su JY, Kerrick WGL: Effects of halothane on  $\text{Ca}^{2+}$ -activated tension development in mechanically disrupted rabbit myocardial fibers. *Pflügers Arch* 375:111-117, 1978
31. Murat I, Ventura-Clapier R, Vassort G: Halothane, enflurane and isoflurane decrease calcium sensitivity and maximum force in detergent-treated rat cardiac fibers. *ANESTHESIOLOGY* 69:892-899, 1988

32. Yue DT, Marban E, Wier WG: Relationship between force and intracellular  $[Ca^{2+}]$  in tetanized mammalian heart muscle. *J Gen Physiol* 87:223-242, 1986
33. Krane EJ, Su JY: Comparison of the effects of halothane on skinned myocardial fibers from newborn and adult rabbit: I. Effects on contractile proteins. *ANESTHESIOLOGY* 70:76-81, 1989
34. Housmans PR, Wanek LA, Carton EG: Halothane, enflurane and isoflurane decrease myofibrillar  $Ca^{2+}$  responsiveness in intact mammalian ventricular muscle (abstract). *Biophys J* 57:554A, 1990
35. Housmans PR: Negative inotropy of halogenated anesthetics in ferret ventricular myocardium. *Am J Physiol* 259:H827-H834, 1990
36. Terrar DA, Victory JGG: Isoflurane depresses membrane currents associated with contraction in myocytes isolated from guinea pig ventricle. *ANESTHESIOLOGY* 69:742-749, 1988
37. Terrar DA, Victory JGG: Effects of halothane on membrane currents associated with contraction in single myocytes isolated from guinea pig ventricle. *Br J Pharmacol* 94:500-508, 1988
38. DeTraglia MC, Komai H, Rusy BF: Differential effects of inhalation anesthetics on myocardial potentiated-state contractions in vitro. *ANESTHESIOLOGY* 68:534-540, 1988
39. Lynch C III: Differential depression of myocardial contractility by volatile anesthetics *in vitro*: Comparison with uncouplers of excitation-contraction coupling. *J Cardiovasc Pharmacol* 15: 655-665, 1990
40. Katsuoka M, Kobayashi K, Ohnishi ST: Volatile anesthetics decrease calcium content of isolated myocytes. *ANESTHESIOLOGY* 70:954-960, 1989
41. Wheeler DM, Rice RT, Lakatta EG: The action of halothane on spontaneous contractile waves and stimulated contractions in isolated rat and dog heart cells. *ANESTHESIOLOGY* 72:911-920, 1990
42. Bosnjak ZJ, Hoka S, Turner LA, Kampine JP: Cardiac protection by halothane following ischemia and calcium paradox, *Cell Calcium Metabolism*. Edited by Fiskum G. New York, Plenum Press, 1989, pp 593-601
